# Supplementary material
Source: MDPI journal article supplement (https://www.mdpi.com/2073-4441/16/9/1208)
Supplement: s1 [file s1]

# Supplementary Material: Enhanced Adsorption Capacity of Ziziphus jujuba Stones Modified with Ortho-Phosphoric Acid for Organic Dye Removal: A Gaussian Process Regression Approach

Abderraouf Guediri<sup>1</sup>, Abdallah Bouguettoucha<sup>1</sup>, Hichem Tahraoui<sup>1,2</sup>, Derradji Chebli<sup>1</sup>, Jie Zhang<sup>3</sup>, Abdeltif Amrane<sup>2,\*</sup>, Lotfi Khezami<sup>4</sup> and Amine Aymen Assadi<sup>5</sup>

<sup>1</sup> Département de Génie des Procédés, Laboratoire de Génie des Procédés Chimiques, Faculté de Technologie, Université Ferhat Abbas, Sétif-1, 19000 Sétif, Algeria ; [a.guediri@univ-setif.dz](mailto:a.guediri@univ-setif.dz) ; [abdallah.bouguettoucha@univ-setif.dz](mailto:abdallah.bouguettoucha@univ-setif.dz) ; [hichem.tahraoui@univ-setif.dz](mailto:hichem.tahraoui@univ-setif.dz) ; [derradji\\_chebli@yahoo.fr](mailto:derradji_chebli@yahoo.fr)

<sup>2</sup> Univ Rennes, Ecole Nationale Supérieure de Chimie de Rennes, CNRS, ISCR – UMR6226, F-35000 Rennes, France; [abdeltif.amrane@univ-rennes1.fr](mailto:abdeltif.amrane@univ-rennes1.fr)

<sup>3</sup> School of Engineering, Merz Court, Newcastle University, Newcastle upon Tyne NE1 7RU, UK; [jie.zhang@newcastle.ac.uk](mailto:jie.zhang@newcastle.ac.uk)

<sup>4</sup> Chemistry Department, College of Science, Imam Mohammad Ibn Saud Islamic University (IMSIU), 11623, Riyadh, Saudi Arabia [lhmkhezami@imamu.edu.sa](mailto:lhmkhezami@imamu.edu.sa)

<sup>5</sup> College of Engineering, Imam Mohammad Ibn Saud Islamic University (IMSIU), Riyadh 11432, Saudi Arabia [AAAssadi@imamu.edu.sa](mailto:AAAssadi@imamu.edu.sa)

\* Correspondence: [abdeltif.amrane@univ-rennes1.fr](mailto:abdeltif.amrane@univ-rennes1.fr) (Abdeltif Amrane)

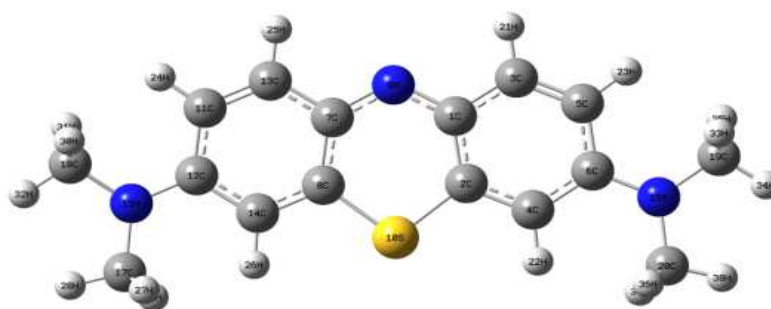

**Figure S1.** Chemical structure of methylene blue.

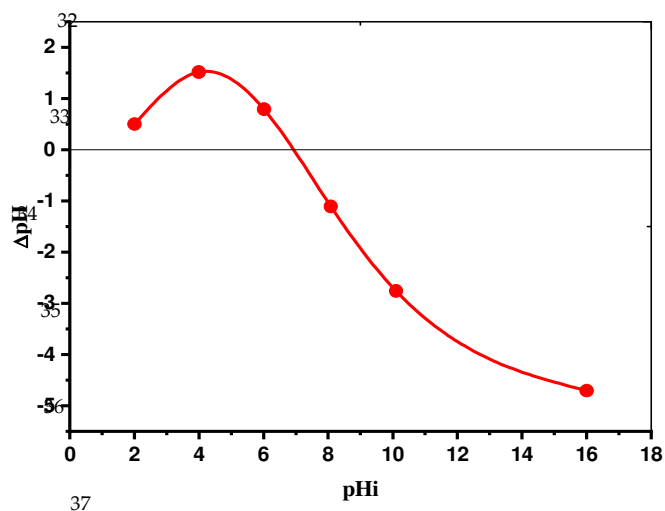

**Figure S2.** The change in final pH as a function of the initial pH for solutions of ZJS- $H_3PO_4$  during the determination of the point of zero charge PZC.

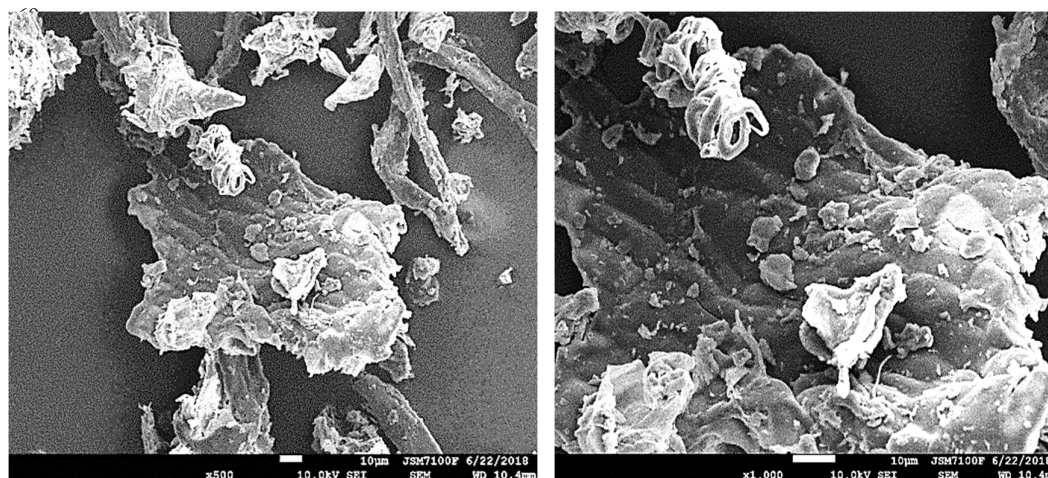

(a)

(b)

**Figure S3.** SEM images of ZJS-H<sub>3</sub>PO<sub>4</sub> with different aggrandizement ( (a) : ×500; (b) : ×1000)

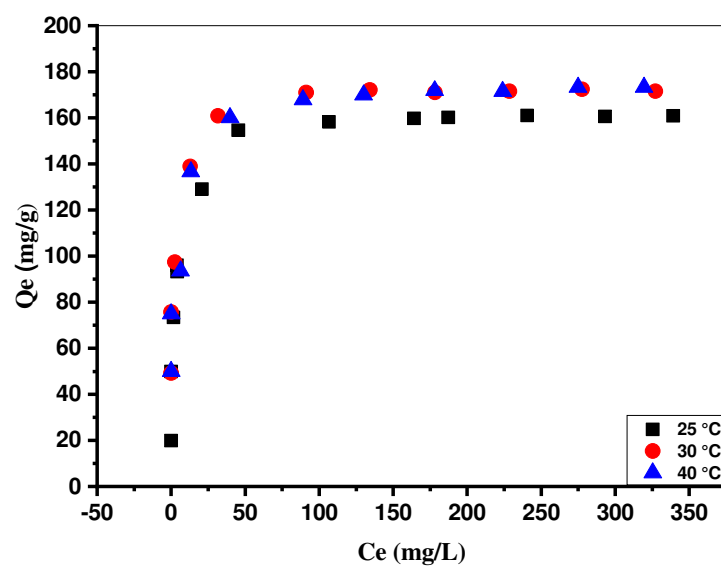

**Figure S4.** Equilibrium isotherms for MB biosorption onto ZJS- $H_3PO_4$  at different temperatures. (agitation speed= 250 rpm, pH=10).

148

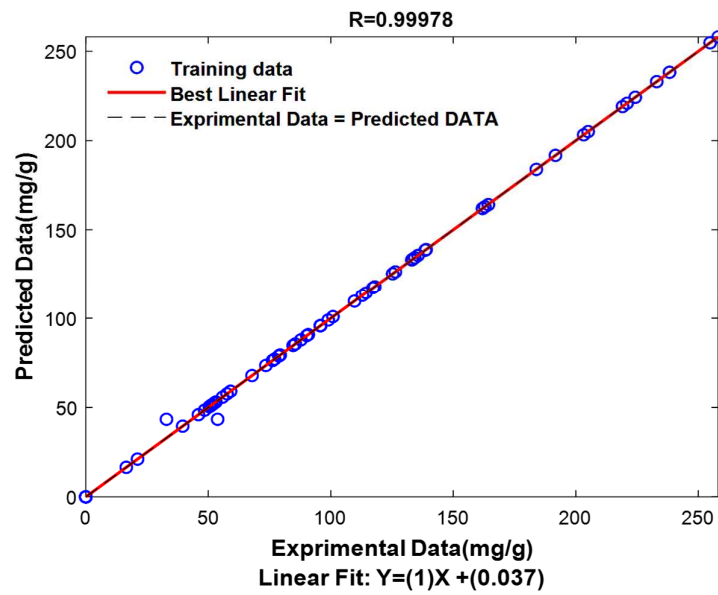

(a)

149

150

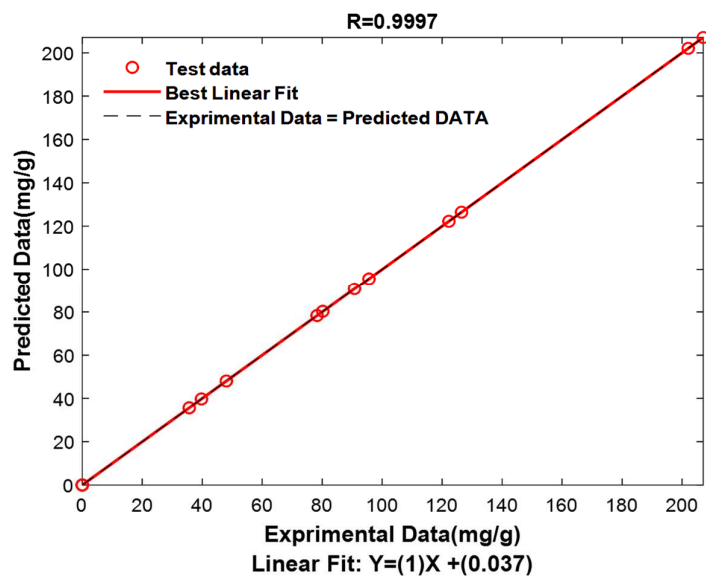

(b)

151

152

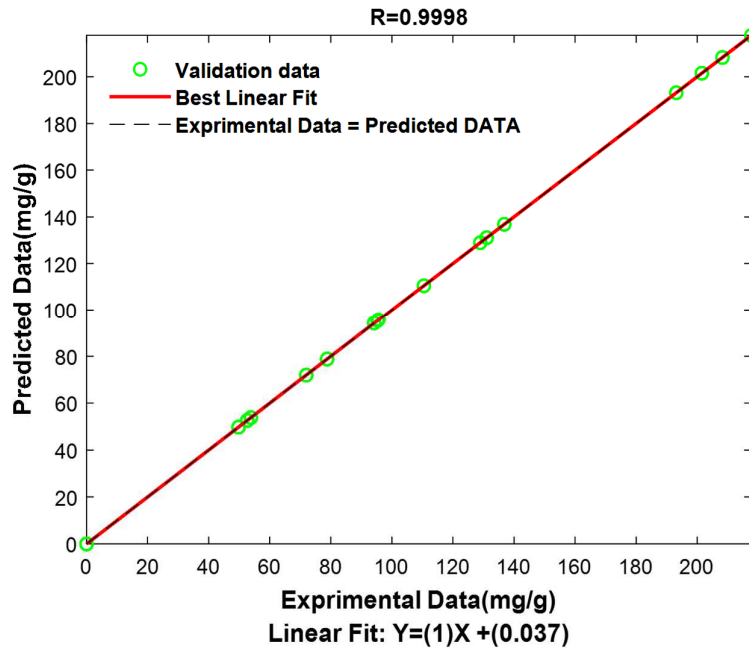

(c)

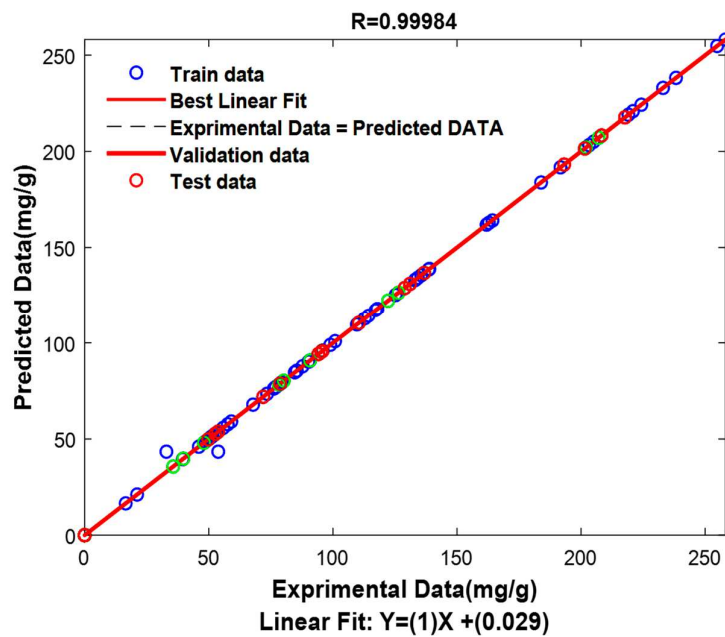

(d)

Figure. S5. Comparison between experimental and predicted values: (a) training data, (b) testing data, (c) validation data, and (d) all data.

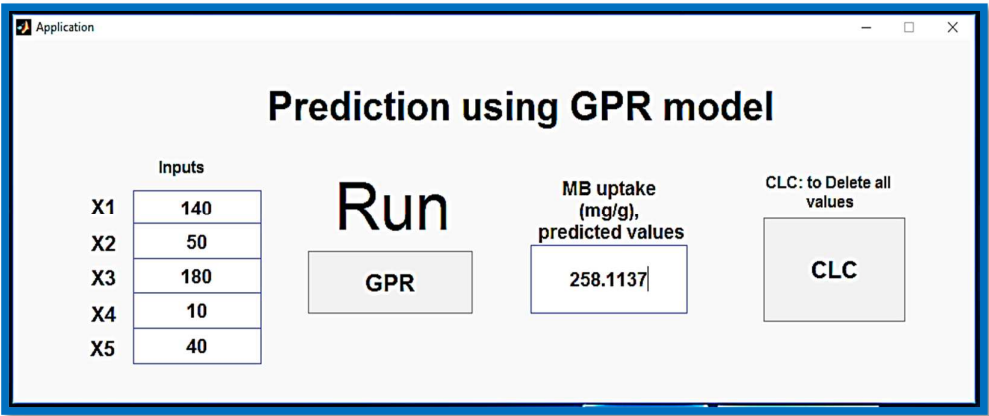

Figure. S6. Application for prediction MB uptake using the GPR
